# Supplementary material for: Association between Heat-Induced Chemical Markers and Ultra-Processed Foods: A Case Study on Breakfast Cereals
Source: PubMed Central journal article supplement (PMC7285198; doi:10.3390/nu12051418), 2020-05-14
Supplement: nutrients-12-01418-s001.pdf [file nutrients-12-01418-s001.pdf]

## Supplementary Material

### Association between heat-induced chemical makers and ultra-processed foods: A case study on breakfast cereals

Francisco J. Morales <sup>1,\*</sup>, Marta Mesías <sup>1</sup> and Cristina Delgado-Andrade <sup>1</sup>

**Figure S1.** Distribution of breakfast cereals segmented by the largest type of grain (rice, oat, maize, wheat, mixture) according to NOVA classification groups. Numbers are percentage of cases.

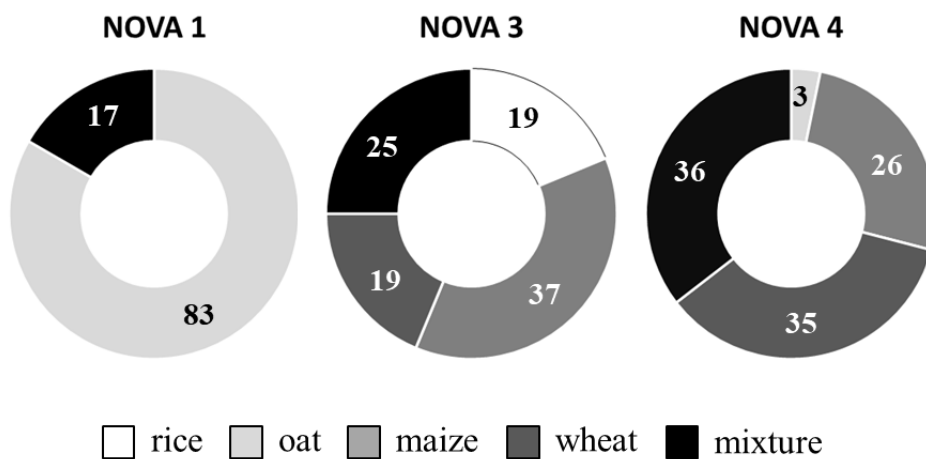

## Supplementary Material

### Association between heat-induced chemical makers and ultra-processed foods: A case study on breakfast cereals

Francisco J. Morales <sup>1,\*</sup>, Marta Mesías <sup>1</sup> and Cristina Delgado-Andrade <sup>1</sup>

**Figure S2.** Contribution of NutriScore descriptors (energy, sugar, saturated fat, sodium, fiber and protein) and heat-induced chemical indexes (acrylamide and HMF) to the mean values of the whole group of breakfast cereals ( $n = 53$ ) across the NOVA categories. NOVA-1 (white circle), NOVA-3 (grey circle), NOVA-4 (black circle). HMF (hydroxymethylfurfural). Lines represent scale at 50%, 100% (dotted line), and 150% from the mean value for each descriptor.

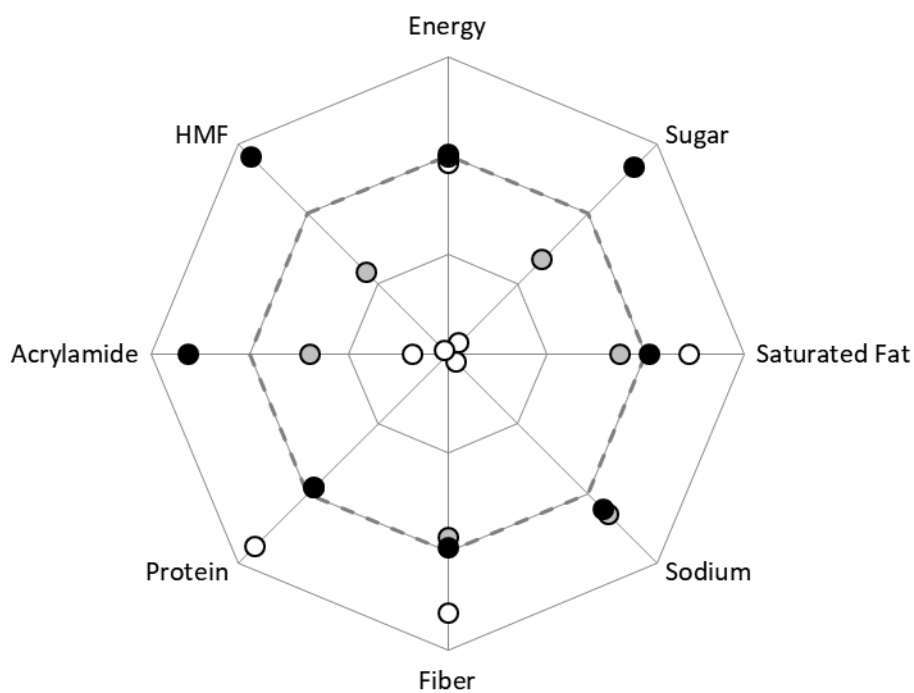

## Supplementary Material

### Association between heat-induced chemical makers and ultra-processed foods: A case study on breakfast cereals

Francisco J. Morales <sup>1,\*</sup>, Marta Mesías <sup>1</sup> and Cristina Delgado-Andrade <sup>1</sup>

**Figure S3.** Classification of breakfast cereals according to the food group “breakfast cereal” as established by the EU Regulation 2017/2158 on acrylamide mitigation and their distribution across the NOVA system. EU-Group 1 (bran products and whole grain cereals, gun puffed grain), EU-Group 2 (wheat and rye based products), EU-Group 3 (maize, oat, spelt, barley and rice based products). Numbers in percentage are cases.

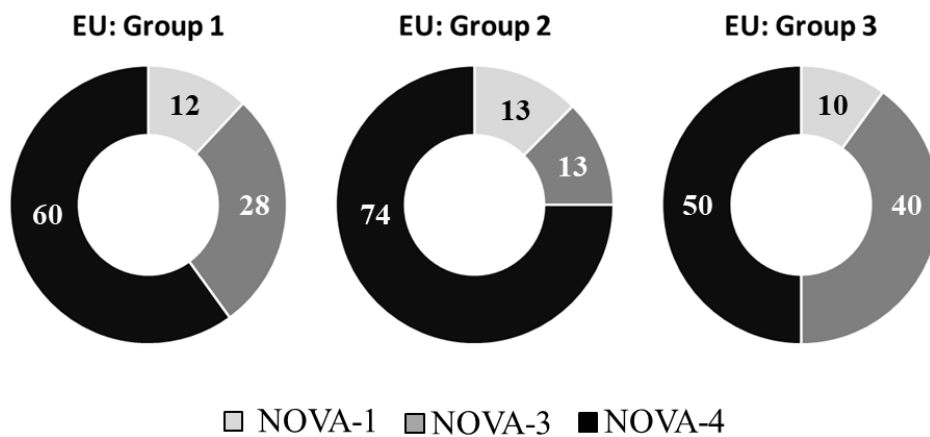

## Supplementary Material

### Association between heat-induced chemical makers and ultra-processed foods: A case study on breakfast cereals

Francisco J. Morales <sup>1,\*</sup>, Marta Mesías <sup>1</sup> and Cristina Delgado-Andrade <sup>1</sup>

**Table S1.** NutriScore distribution of the nutrient descriptors (energy density, sugar, saturated fatty acids, sodium, fiber and protein) content in breakfast cereals ( $n = 53$ ) according to the NutriScore classification system. Confidence interval (C.I.), minimum (min.), maximum (max.).

| <b>NutriScore A (<math>n = 10</math>)</b> | <b>mean</b> | <b>C.I.(95%)</b> | <b>min.</b> | <b>max.</b> | <b>median</b> |
|-------------------------------------------|-------------|------------------|-------------|-------------|---------------|
| Energy (kJ/100 g)                         | 1524        | (1488 - 1560)    | 1460        | 1615        | 1513          |
| Sugar (g/100 g)                           | 1.9         | (0.7 - 3.1)      | 0.7         | 4.8         | 1.2           |
| Saturated fatty acids (g/100 g)           | 0.80        | (0.53 - 1.07)    | 0.20        | 1.30        | 0.75          |
| Sodium (mg/100 g)                         | 80          | (0 - 168)        | 0           | 400         | 50            |
| Fiber (g/100 g)                           | 8.6         | (6.1 - 11.2)     | 3.3         | 14.7        | 9.8           |
| Protein (g/100 g)                         | 12.0        | (9.5 - 14.6)     | 7.3         | 19.0        | 11.8          |

  

| <b>NutriScore B (<math>n = 7</math>)</b> | <b>mean</b> | <b>C.I.(95%)</b> | <b>min.</b> | <b>max.</b> | <b>median</b> |
|------------------------------------------|-------------|------------------|-------------|-------------|---------------|
| Energy (kJ/100 g)                        | 1475        | (1382 - 1569)    | 1331        | 1582        | 1502          |
| Sugar (g/100 g)                          | 12.5        | (6.2 - 18.9)     | 2           | 23.0        | 13            |
| Saturated fatty acids (g/100 g)          | 0.70        | (0.36 - 1.03)    | 0.20        | 1.40        | 0.70          |
| Sodium (mg/100 g)                        | 271         | (133 - 410)      | 50          | 400         | 300           |
| Fiber (g/100 g)                          | 18.9        | (9.2 - 28.6)     | 3.0         | 31.0        | 19.0          |
| Protein (g/100 g)                        | 12.2        | (9.7 - 16.6)     | 7.0         | 15.0        | 12.0          |

  

| <b>NutriScore C (<math>n = 20</math>)</b> | <b>mean</b> | <b>C.I.(95%)</b> | <b>min.</b> | <b>max.</b> | <b>median</b> |
|-------------------------------------------|-------------|------------------|-------------|-------------|---------------|
| Energy (kJ/100 g)                         | 1572        | (1520 - 1625)    | 1322        | 1841        | 1578          |
| Sugar (g/100 g)                           | 19.6        | (14.2 - 25.0)    | 1.3         | 43.0        | 20.2          |
| Saturated fatty acids (g/100 g)           | 0.69        | (0.16 - 1.22)    | 0.10        | 5.20        | 0.30          |
| Sodium (mg/100 g)                         | 305         | (208 - 401)      | 0           | 700         | 350           |
| Fiber (g/100 g)                           | 6.8         | (2.7 - 11.1)     | 0.0         | 33.1        | 4.9           |
| Protein (g/100 g)                         | 6.9         | (7.0 - 9.4)      | 5.6         | 15.3        | 7.6           |

  

| <b>NutriScore D (<math>n = 16</math>)</b> | <b>mean</b> | <b>C.I.(95%)</b> | <b>min.</b> | <b>max.</b> | <b>median</b> |
|-------------------------------------------|-------------|------------------|-------------|-------------|---------------|
| Energy (kJ/100 g)                         | 1623        | (1561 - 1684)    | 1431        | 1946        | 1594          |
| Sugar (g/100 g)                           | 25.0        | (17.4 - 32.7)    | 2.7         | 49.0        | 24.4          |
| Saturated fatty acids (g/100 g)           | 1.28        | (0.02 - 2.53)    | 0.10        | 9.50        | 0.60          |
| Sodium (mg/100 g)                         | 369         | (183 - 554)      | 0           | 1100        | 350           |
| Fiber (g/100 g)                           | 4.8         | (3.0 - 6.5)      | 0.0         | 12.0        | 3.8           |
| Protein (g/100 g)                         | 7.8         | (6.5 - 9.0)      | 4.5         | 13.0        | 8.1           |
